# Supplementary material for: Cycles of autoubiquitination and deubiquitination regulate the ERAD ubiquitin ligase Hrd1
Source: eLife journal article supplement (doi:10.7554/elife.50903), 2019-11-12
Supplement: supp [file elife-50903-supp-v1.zip]

Archive with 9 entries (9 files):
- elife_poa_e50903_Figure_1_figure_supplement_1.pdf
- elife_poa_e50903_Supplementary_file_1.docx
- elife_poa_e50903_Supplementary_file_3.xlsx
- elife_poa_e50903_Figure_2_figure_supplement_1.pdf
- elife_poa_e50903_Figure_4_figure_supplement_1.pdf
- elife_poa_e50903_Figure_1_figure_supplement_2.pdf
- elife_poa_e50903_Transparent_Reporting_File.pdf
- elife_poa_e50903_Figure_1_figure_supplement_3.pdf
- elife_poa_e50903_Supplementary_file_2.docx
