# Supplementary material for: Cycles of autoubiquitination and deubiquitination regulate the ERAD ubiquitin ligase Hrd1
Source: eLife journal article supplement (doi:10.7554/elife.50903), 2019-11-12
Supplement: supp [file elife-50903-supp-v1.zip › elife_poa_e50903_Supplementary_file_3.xlsx]

## Sheet: Hrd1
Anova: Single Factor										Tukey's Honest Significant Difference test					For alpha = 0.05, q should be > 5.4 (with 94 df)
Hrd1															For alpha = 0.001, q should be > 7.1 (with 94 df)
SUMMARY
Groups	Count	Sum	Average	Variance						Empty vs:	Difference	n (group1)	n (group 2)	SE	q
empty	5	5	1	0						empty	0	5	5	0.239531	0
Yuh1	5	8.56159	1.71232	0.271317						Yuh1	0.712318	5	5	0.239531	2.9738
Ubp1	5	15.5172	3.10343	0.158715						Ubp1	2.10343	5	5	0.239531	8.78147
Ubp2	5	7.46815	1.49363	0.083595						Ubp2	0.493631	5	5	0.239531	2.06082
Ubp3	5	7.66382	1.53276	0.0718293						Ubp3	0.532764	5	5	0.239531	2.2242
Ubp5	5	9.72892	1.94578	0.147653						Ubp5	0.945784	5	5	0.239531	3.94849
Ubp6	5	7.88515	1.57703	0.20322						Ubp6	0.57703	5	5	0.239531	2.409
Ubp7	5	7.335	1.467	0.120869						Ubp7	0.466999	5	5	0.239531	1.94964
Ubp8	5	6.7883	1.35766	0.0436012						Ubp8	0.357661	5	5	0.239531	1.49317
Ubp9	5	7.53509	1.50702	0.58255						Ubp9	0.507017	5	5	0.239531	2.11671
Ubp10	5	7.12579	1.42516	0.163844						Ubp10	0.425159	5	5	0.239531	1.77496
Ubp11	5	5.59967	1.11993	0.145561						Ubp11	0.119934	5	5	0.239531	0.500706
Ubp12	5	7.22139	1.44428	0.286476						Ubp12	0.444278	5	5	0.239531	1.85478
Ubp13	5	6.93733	1.38747	0.591986						Ubp13	0.387465	5	5	0.239531	1.6176
Ubp14	5	5.32104	1.06421	0.204616						Ubp14	0.0642074	5	5	0.239531	0.268055
Ubp15	5	6.41375	1.28275	0.501129						Ubp15	0.282749	5	5	0.239531	1.18043
Ubp16	5	8.10526	1.62105	0.942269						Ubp16	0.621053	5	5	0.239531	2.59279
Doa4	5	5.7869	1.15738	0.364457						Doa4	0.157379	5	5	0.239531	0.657032
Sad1	4	5.16398	1.291	0.375954						Sad1	0.290996	4	5	0.254061	1.14538
Otu1	5	7.10192	1.42038	0.505092						Otu1	0.420383	5	5	0.239531	1.75503
Otu2	5	5.78104	1.15621	0.325575						Otu2	0.156208	5	5	0.239531	0.652143
Rri1	4	3.55867	0.889666	0.105137						Rri1	0.110334	4	5	0.254061	0.434281
Rpn11	5	7.91341	1.58268	0.394914						Rpn11	0.582682	5	5	0.239531	2.4326
Rpn8	5	7.61784	1.52357	0.27147						Rpn8	0.523569	5	5	0.239531	2.18581
ANOVA
Source of Variation	SS	df	MS	F	P-value	F crit
Between Groups	20.3386	23	0.884287	3.08248	6.61798e-05	1.64476
Within Groups	26.9662	94	0.286875
Total	47.3048	117

## Sheet: Hrd3
Anova: Single Factor										Tukey's Honest Significant Difference test					For alpha = 0.05, q should be > 5.5 (with 48 df)
Hrd3															For alpha = 0.001, q should be > 7.5 (with 48 df)
SUMMARY
Groups	Count	Sum	Average	Variance						Empty vs:	Difference	n (group1)	n (group 2)	SE	q
empty	3	3	1	0						empty	0	3	3	0.215133	0
Yuh1	3	3.36456	1.12152	0.0261104						Yuh1	0.121521	3	3	0.215133	0.564864
Ubp1	3	3.76522	1.25507	0.147434						Ubp1	0.255074	3	3	0.215133	1.18565
Ubp2	3	3.85453	1.28484	0.0531347						Ubp2	0.284845	3	3	0.215133	1.32404
Ubp3	3	5.23487	1.74496	0.382412						Ubp3	0.744957	3	3	0.215133	3.46277
Ubp5	3	4.72154	1.57385	0.453007						Ubp5	0.573846	3	3	0.215133	2.6674
Ubp6	3	3.0933	1.0311	0.0245737						Ubp6	0.0310983	3	3	0.215133	0.144554
Ubp7	3	2.99534	0.998446	0.120965						Ubp7	0.00155367	3	3	0.215133	0.00722188
Ubp8	3	2.55574	0.851914	0.0823711						Ubp8	0.148086	3	3	0.215133	0.688345
Ubp9	3	1.99098	0.663661	0.0275453						Ubp9	0.336339	3	3	0.215133	1.5634
Ubp10	3	2.59986	0.866619	0.0634484						Ubp10	0.133381	3	3	0.215133	0.619992
Ubp11	3	2.73216	0.910721	0.00971743						Ubp11	0.0892793	3	3	0.215133	0.414995
Ubp12	3	2.01777	0.672589	0.133775						Ubp12	0.327411	3	3	0.215133	1.5219
Ubp13	3	1.43698	0.478995	0.031529						Ubp13	0.521005	3	3	0.215133	2.42178
Ubp14	3	1.58202	0.527339	0.0058743						Ubp14	0.472661	3	3	0.215133	2.19706
Ubp15	3	2.14168	0.713894	0.0116074						Ubp15	0.286106	3	3	0.215133	1.3299
Ubp16	3	2.72853	0.909511	0.0212234						Ubp16	0.0904887	3	3	0.215133	0.420617
Doa4	3	2.4074	0.802466	0.00979591						Doa4	0.197534	3	3	0.215133	0.918193
Sad1	3	3.02995	1.00998	0.110741						Sad1	0.009983	3	3	0.215133	0.0464038
Otu1	3	3.64723	1.21574	0.545378						Otu1	0.215743	3	3	0.215133	1.00284
Otu2	3	3.64589	1.2153	0.629611						Otu2	0.215296	3	3	0.215133	1.00075
RRI1	3	1.75573	0.585243	0.00915775						Rri1	0.414757	3	3	0.215133	1.9279
Rpn11	3	3.26484	1.08828	0.253542						Rpn11	0.088281	3	3	0.215133	0.410355
Rpn8	3	3.0776	1.02587	0.179377						Rpn8	0.025866	3	3	0.215133	0.120232
ANOVA
Source of Variation	SS	df	MS	F	P-value	F crit
Between Groups	6.60929	23	0.28736	2.06962	0.0168919	1.75676
Within Groups	6.66466	48	0.138847
Total	13.2739	71

## Sheet: Usa1
Anova: Single Factor										Tukey's Honest Significant Difference test					For alpha = 0.05, q should be > 5.5 (with 48 df)
Usa1															For alpha = 0.001, q should be > 7.5 (with 48 df)
SUMMARY
Groups	Count	Sum	Average	Variance						Empty vs:	Difference	n (group1)	n (group 2)	SE	q
empty	3	3	1	0						empty	0	3	3	0.230399	0
Yuh1	3	3.65836	1.21945	0.134065						Yuh1	0.219455	3	3	0.230399	0.952499
Ubp1	3	2.87837	0.959457	0.13322						Ubp1	0.040543	3	3	0.230399	0.175968
Ubp2	3	3.80534	1.26845	0.110892						Ubp2	0.268446	3	3	0.230399	1.16513
Ubp3	3	2.66423	0.888077	0.434004						Ubp3	0.111923	3	3	0.230399	0.48578
Ubp5	3	3.39048	1.13016	0.0296338						Ubp5	0.13016	3	3	0.230399	0.564931
Ubp6	3	3.75345	1.25115	0.174263						Ubp6	0.25115	3	3	0.230399	1.09007
Ubp7	3	3.8124	1.2708	0.116483						Ubp7	0.270801	3	3	0.230399	1.17536
Ubp8	3	2.44462	0.814874	0.181786						Ubp8	0.185126	3	3	0.230399	0.803503
Ubp9	3	2.88788	0.962628	0.011101						Ubp9	0.0373723	3	3	0.230399	0.162207
Ubp10	3	2.05071	0.683571	0.00133432						Ubp10	0.316429	3	3	0.230399	1.37339
Ubp11	3	3.49173	1.16391	0.0668071						Ubp11	0.16391	3	3	0.230399	0.711416
Ubp12	3	2.68928	0.896426	0.0409747						Ubp12	0.103574	3	3	0.230399	0.449541
Ubp13	3	2.86422	0.954739	0.113022						Ubp13	0.0452613	3	3	0.230399	0.196447
Ubp14	3	2.31013	0.770042	0.312128						Ubp14	0.229958	3	3	0.230399	0.998087
Ubp15	3	3.83134	1.27711	0.490717						Ubp15	0.277113	3	3	0.230399	1.20275
Ubp16	3	2.54054	0.846848	0.182691						Ubp16	0.153152	3	3	0.230399	0.664726
Doa4	3	3.3991	1.13303	0.696794						Doa4	0.133033	3	3	0.230399	0.577401
Sad1	3	4.55824	1.51941	0.128179						Sad1	0.519413	3	3	0.230399	2.2544
Otu1	3	4.14604	1.38201	0.17692						Otu1	0.382014	3	3	0.230399	1.65805
Otu2	3	2.83575	0.94525	0.0698233						Otu2	0.05475	3	3	0.230399	0.237631
Rri1	3	2.31966	0.77322	0.169064						Rri1	0.22678	3	3	0.230399	0.98429
Rpn11	3	3.49679	1.1656	0.0223466						Rpn11	0.165596	3	3	0.230399	0.718734
Rpn8	3	3.37899	1.12633	0.0257859						Rpn8	0.126331	3	3	0.230399	0.548315
ANOVA
Source of Variation	SS	df	MS	F	P-value	F crit
Between Groups	3.19673	23	0.138988	0.872761	0.629779	1.75676
Within Groups	7.64407	48	0.159251
Total	10.8408	71

## Sheet: CPY
Anova: Single Factor										Tukey's Honest Significant Difference test					For alpha = 0.05, q should be > 5.5 (with 48 df)
CPY*															For alpha = 0.001, q should be > 7.5 (with 48 df)
SUMMARY
Groups	Count	Sum	Average	Variance						Empty vs:	Difference	n (group1)	n (group 2)	SE	q
empty	3	3	1	0						empty	0	3	3	0.163367	0
Yuh1	3	3.03018	1.01006	0.00223453						Yuh1	0.0100601	3	3	0.163367	0.0615797
Ubp1	3	3.86182	1.28727	0.00818574						Ubp1	0.287272	3	3	0.163367	1.75845
Ubp2	3	4.52224	1.50741	0.62181						Ubp2	0.507412	3	3	0.163367	3.10596
Ubp3	3	2.93929	0.979765	0.000540074						Ubp3	0.020235	3	3	0.163367	0.123862
Ubp5	3	4.07679	1.35893	0.0268961						Ubp5	0.358931	3	3	0.163367	2.19708
Ubp6	3	3.83305	1.27768	0.0420051						Ubp6	0.277685	3	3	0.163367	1.69976
Ubp7	3	3.31747	1.10582	0.0487931						Ubp7	0.105824	3	3	0.163367	0.647768
Ubp8	3	4.68496	1.56165	0.109845						Ubp8	0.561653	3	3	0.163367	3.43798
Ubp9	3	3.33951	1.11317	0.0297337						Ubp9	0.113169	3	3	0.163367	0.69273
Ubp10	3	2.56275	0.854249	0.00942872						Ubp10	0.145751	3	3	0.163367	0.892166
Ubp11	3	2.59255	0.864185	0.00297254						Ubp11	0.135815	3	3	0.163367	0.831348
Ubp12	3	3.01188	1.00396	0.0348947						Ubp12	0.00396067	3	3	0.163367	0.024244
Ubp13	3	3.06795	1.02265	0.0957336						Ubp13	0.02265	3	3	0.163367	0.138645
Ubp14	3	3.1122	1.0374	0.103277						Ubp14	0.0373997	3	3	0.163367	0.22893
Ubp15	3	4.53068	1.51023	0.211898						Ubp15	0.510227	3	3	0.163367	3.12319
Ubp16	3	3.19177	1.06392	0.228363						Ubp16	0.063924	3	3	0.163367	0.39129
Doa4	3	2.86179	0.953931	0.169074						Doa4	0.046069	3	3	0.163367	0.281997
Sad1	3	3.15663	1.05221	0.0382937						Sad1	0.0522087	3	3	0.163367	0.319579
Otu1	3	2.72445	0.908148	0.0443924						Otu1	0.0918517	3	3	0.163367	0.562241
Otu2	3	3.24857	1.08286	0.0325488						Otu2	0.082855	3	3	0.163367	0.50717
RRI1	3	3.12537	1.04179	0.00964237						Rri1	0.04179	3	3	0.163367	0.255804
Rpn11	3	3.74116	1.24705	0.0178976						Rpn11	0.247054	3	3	0.163367	1.51226
Rpn8	3	3.3861	1.1287	0.033137						Rpn8	0.128699	3	3	0.163367	0.787788
ANOVA
Source of Variation	SS	df	MS	F	P-value	F crit
Between Groups	2.76942	23	0.12041	1.50387	0.115952	1.75676
Within Groups	3.84319	48	0.0800665
Total	6.61261	71
