# Supplementary figures and images for: Cycles of autoubiquitination and deubiquitination regulate the ERAD ubiquitin ligase Hrd1
Source: eLife journal article supplement (doi:10.7554/elife.50903), 2019-11-12

**A**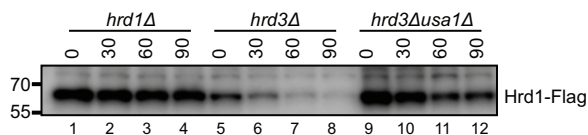**B**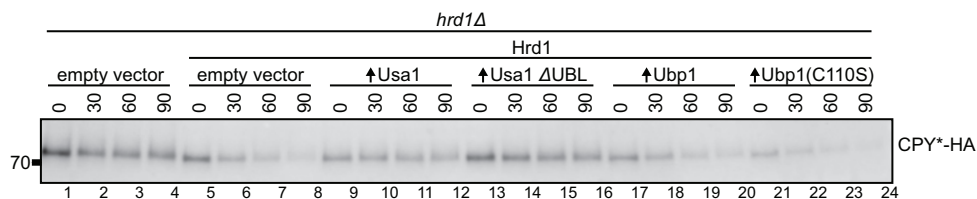**C**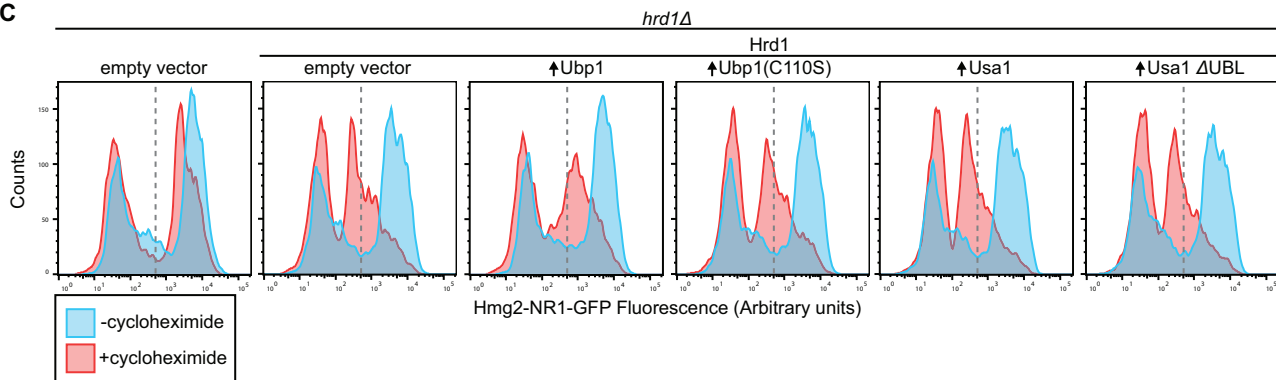**D**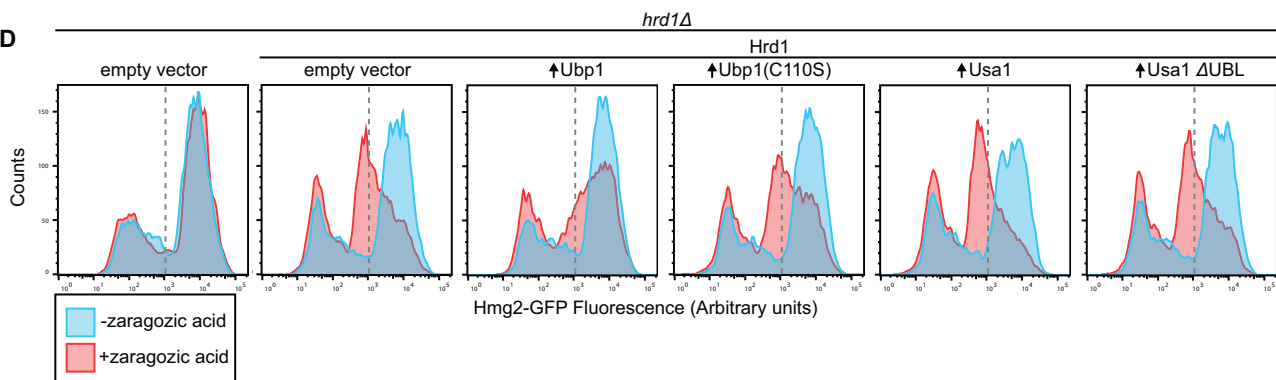

Supplement: supp [file elife-50903-supp-v1.zip]

**A**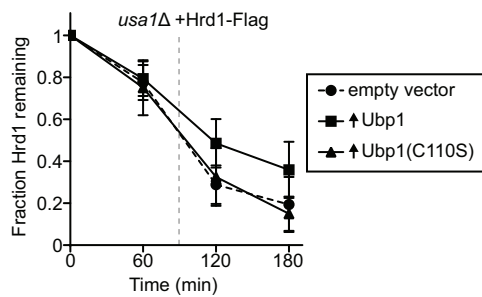**B**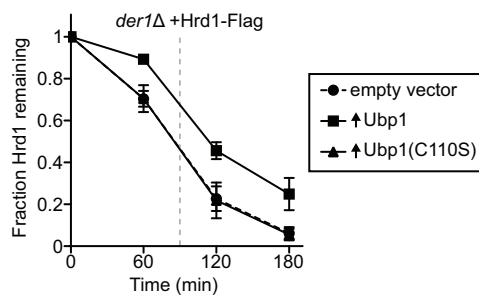**C**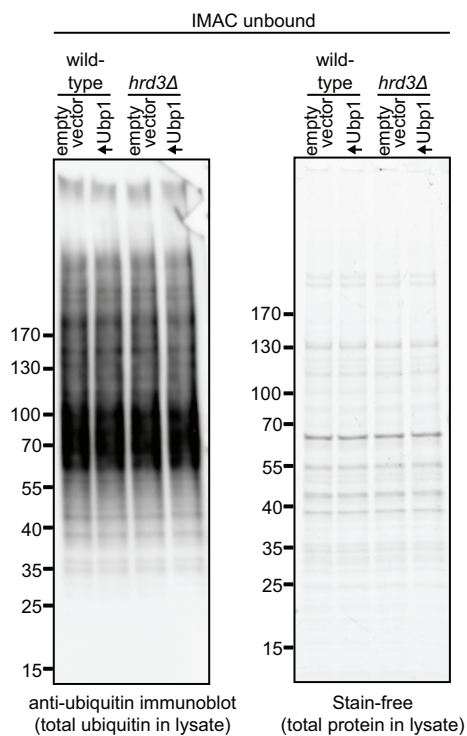**D**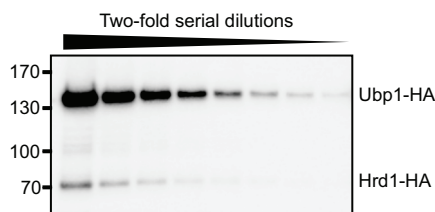**E**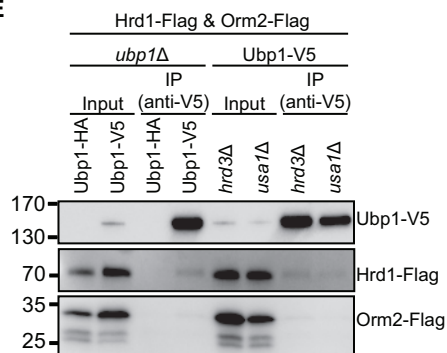

Supplement: supp [file elife-50903-supp-v1.zip]

**A**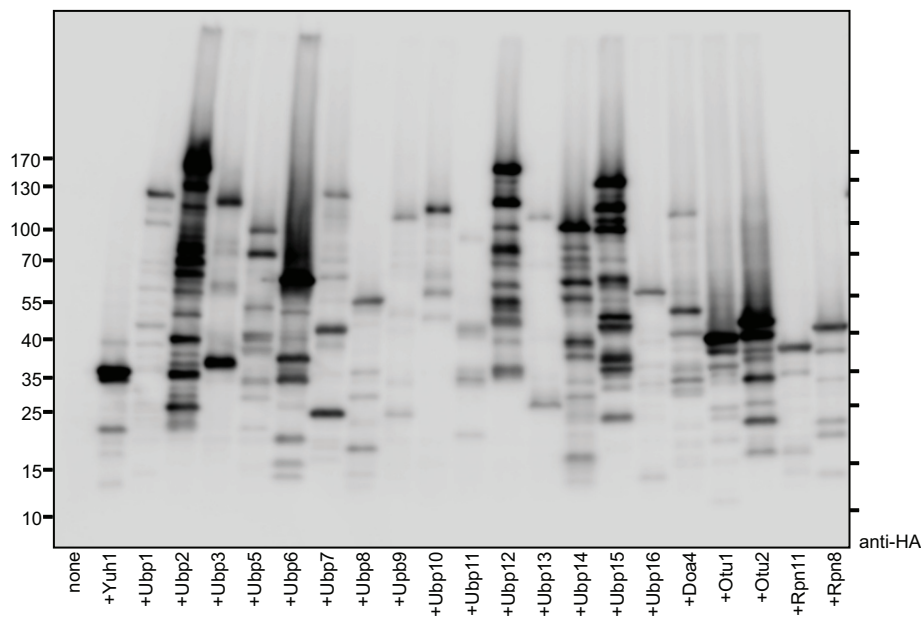**B**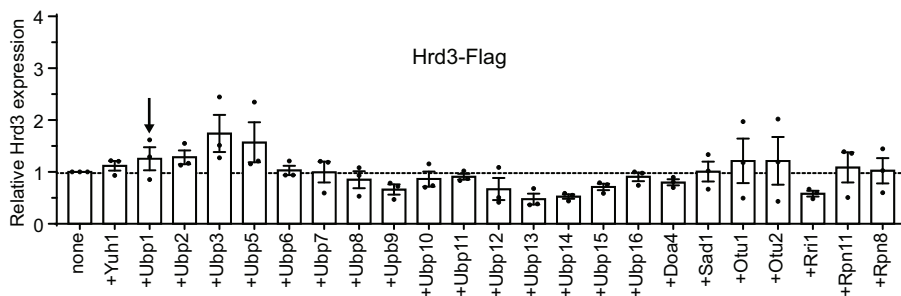**C**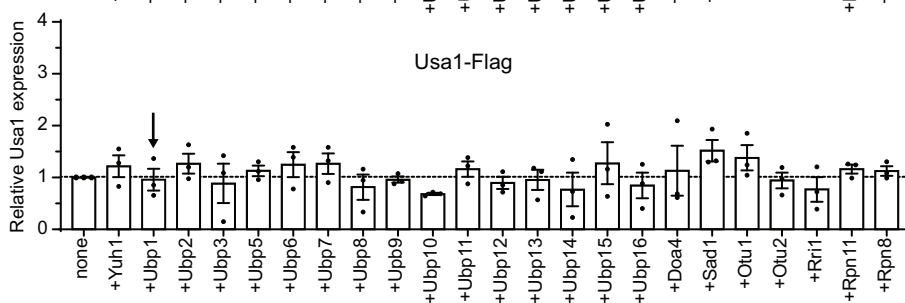**D**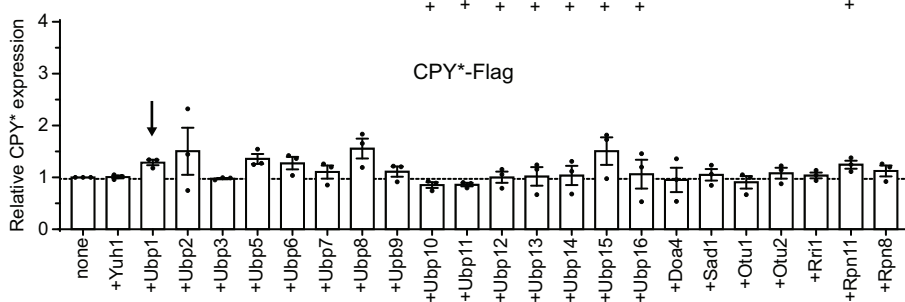

Supplement: supp [file elife-50903-supp-v1.zip]

**A**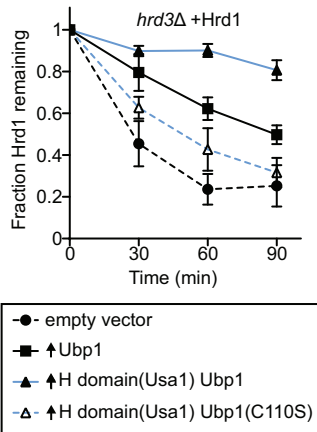**B**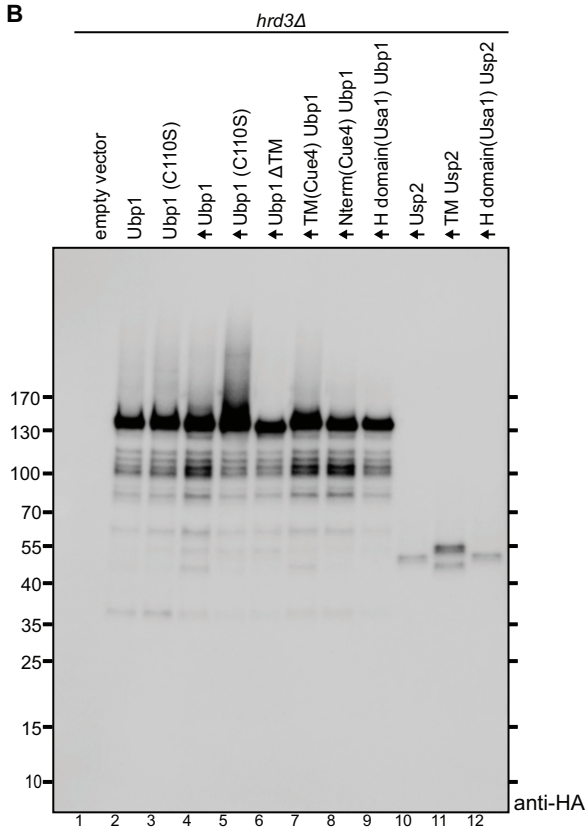

Supplement: supp [file elife-50903-supp-v1.zip]

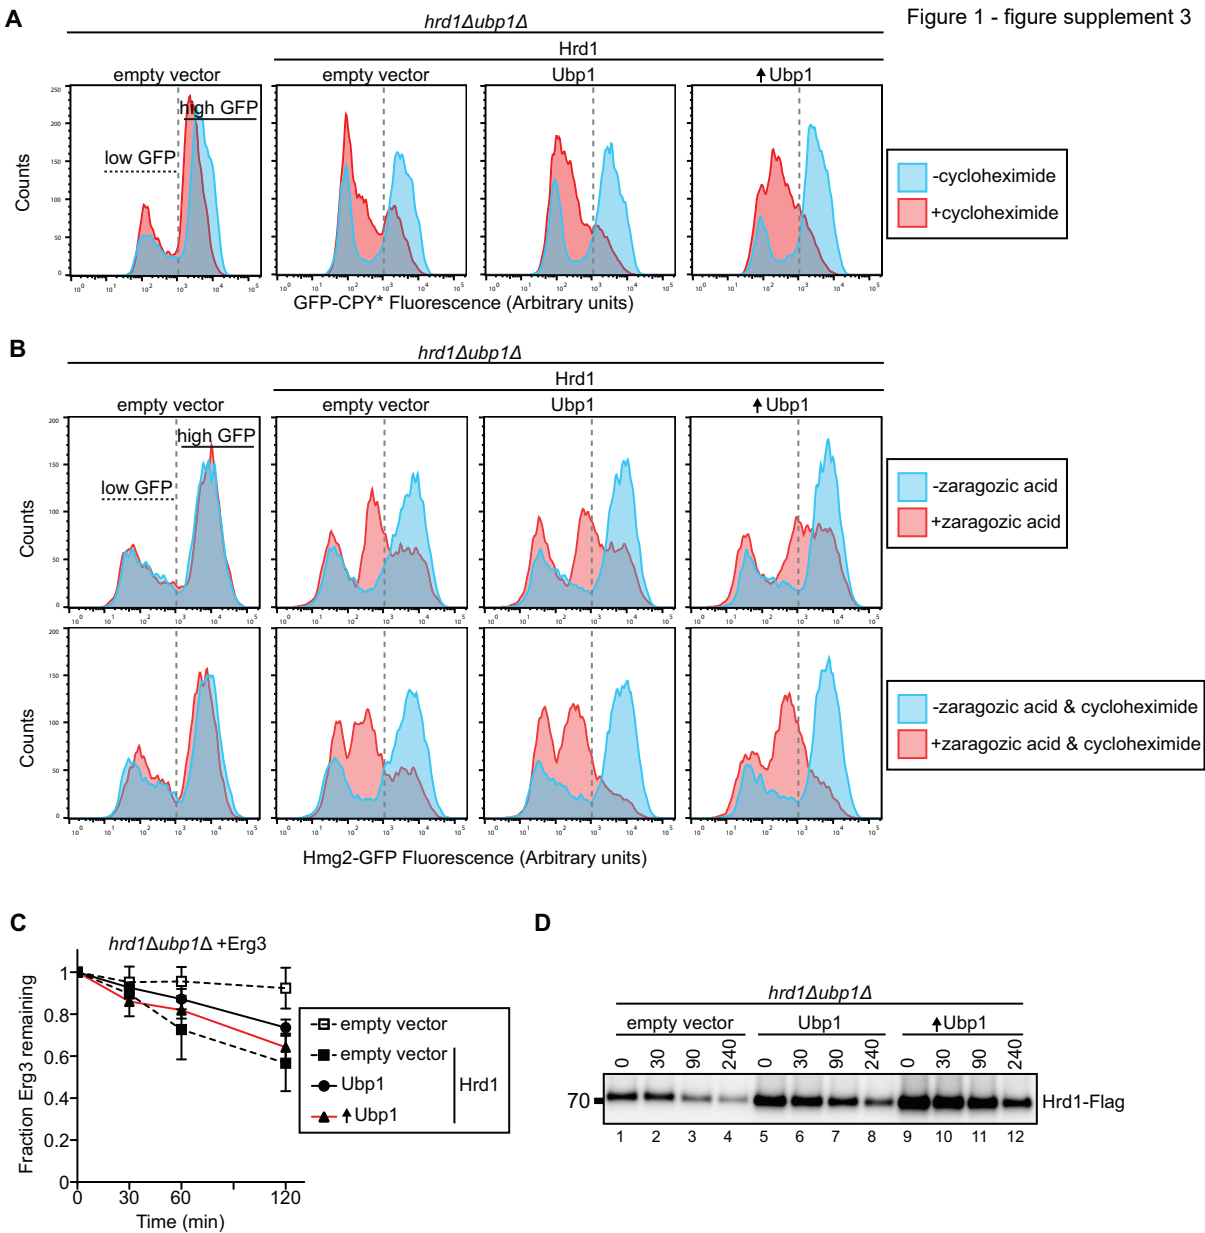

Supplement: supp [file elife-50903-supp-v1.zip]
